# Supplementary material for: Cryogenic efficient phase separation of oil–water emulsions with amphiphilic hyperbranched poly(amido-amine)
Source: Royal Society of Chemistry journal article supplement (doi:10.1039/d3ta01713c), 2023-01-01
Supplement: d3ta01713c1.pdf [file d3ta01713c1.pdf]

1 **Supporting Information**

2 **Cryogenic Efficient Phase Separation of Oil-water**  
3 **Emulsions with Amphiphilic Hyperbranched**  
4 **Poly(amido-amine)**

5 *Shu Yan*<sup>a, c</sup>, *Pengfei Jiang*<sup>b</sup>, *Xinghong Zhang*<sup>a, c</sup>, *Yongsheng Guo*<sup>b, c\*\*</sup>,  
6 *and Wenjun Fang*<sup>b, c\*</sup>

7 <sup>a</sup> Department of Polymer Science and Engineering, Zhejiang University, Hangzhou  
8 310027, China

9 <sup>b</sup> Department of Chemistry, Zhejiang University, Hangzhou 310058, China

10 <sup>c</sup> Center of Chemistry for Frontier Technologies, Zhejiang University, Hangzhou  
11 310027, China

12 \* Corresponding author. Tel.: +86-571-88981416; Fax: +86-571-88981416

13 Email address: [fwjun@zju.edu.cn](mailto:fwjun@zju.edu.cn)

14

15

16 **I. Materials**

17 Ethylenediamine (EDA) (99 %), methyl acrylate (MA) (98.5 %), palmitic acid (97  
18 %), Tween 80, Span 80, 4-dimethylaminopyridine (DMAP, 99 %) and 1-ethyl-3-(3-  
19 dimethylaminopropyl) carbodiimide hydrochloride (EDCI, 98 %) were purchased  
20 from Aladdin Chemical Reagent Corporation. Methanol (99.5 %), ethyl ether (99.5  
21 %), chloroform (99 %), acetone (99.5 %), toluene (99.5 %), *n*-hexane (97 %), and  
22 triethylamine (Et<sub>3</sub>N, 99 %) were purchased from Sino-pharm Chemical Reagent

23 Corporation. Diesel (0#,  $\eta_{25\text{ }^\circ\text{C}} = 5.43\text{ mPa}\cdot\text{s}$ ;  $\rho_{25\text{ }^\circ\text{C}} = 0.825\text{ g}\cdot\text{cm}^{-3}$ ) was provided by  
24 China National Petroleum Corporation. Bitumen samples and various dehydrated  
25 crude oils were obtained from Liaohe, Xinan and Xijiang oilfields, China. All of these  
26 experiment reagents were used without further purification.

## 27 II. Procedures for Preparation of HPAMAM and CHPAMAM

28 EDA (15.0 g, 0.25 mol) was dissolved in 50 mL of methanol containing MA (21.5  
29 g, 0.25 mol) with magnetic stirring. The solution was stirred in an ice-water bath for  
30 48 h, and most methanol was removed. Subsequently, the reaction system was kept in  
31 an oil bath for 1.5 h at 60 °C to further process the residual methanol. The mixture  
32 was reacted at 80 °C, 100 °C, 120 °C and 140 °C for 2 h, respectively, through a  
33 rotary evaporator under vacuum to form macromolecules. HPAMAM was purified by  
34 precipitating into ethyl ether and dried for 12 h at 50 °C in vacuo.

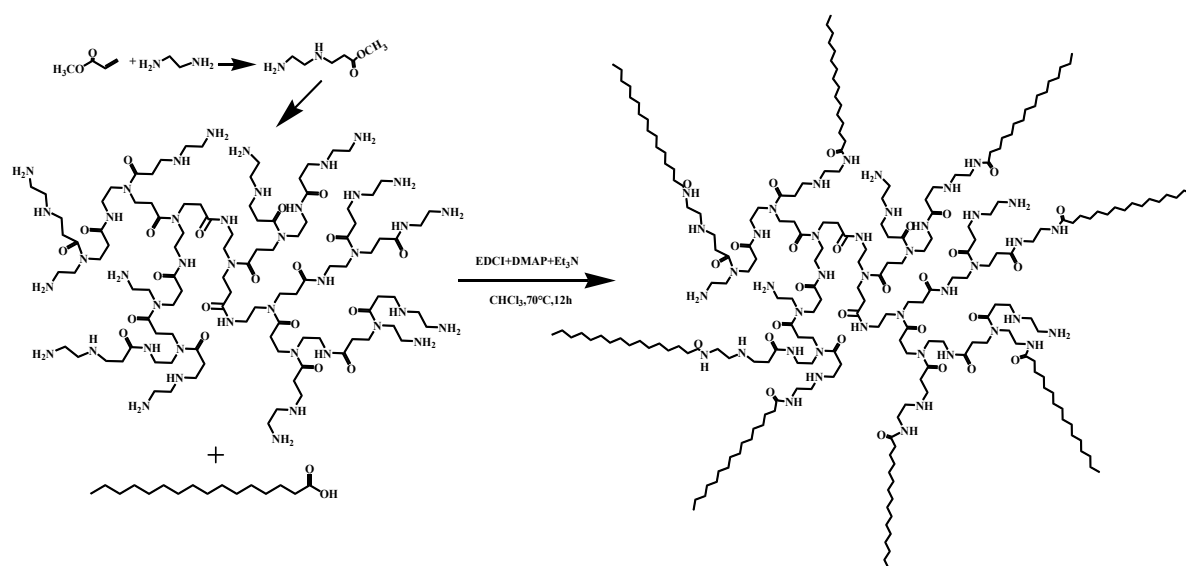

35  
36 **Fig. S1** Preparation of hyperbranched poly(amido-amine) (HPAMAM) with MA and EDA as starting materials  
37 and its functional product CHPAMAM

## 38 III. Preparation of oil-in-water (O/W) simulative emulsions

39 A series of oil-in-water emulsions were prepared: 10 % w/v diesel and 40 % w/v

40 diesel. For example, 100 g of diesel mixed with 0.18 g of Span 80 was added into a  
41 1000 mL polypropylene beaker containing 1.82 g of Tween 80, and then, water was  
42 added to reach the scale mark. Subsequently, the system was deeply stirred at 30000  
43  $\text{r}\cdot\text{min}^{-1}$  for 15 min with a high-shear mechanical homogenizer (AF-B1, A-FIND,  
44 China). The average droplet sizes of two kinds of emulsions measured by dynamic  
45 light scattering (DLS) were less than 3  $\mu\text{m}$ , which could ensure the adequate stability  
46 of the emulsions during the experimental period.

#### 47 **IV. Demulsification tests**

48 The demulsification effect was assessed by measuring the oil removal ratio of  
49 emulsions and the water content of the upper phase. In each test, newly formulated  
50 emulsions (50 mL) and the demulsifier solution (0.1 mL) with a given concentration  
51 were mixed thoroughly by repeated oscillations in a 50 mL color-comparison tube.  
52 The emulsions without any demulsifier were compared by applying the same  
53 operation conditions as the blank experiment. Subsequently, the colorimetric tubes  
54 were placed in a thermostatic water bath (DKZ-2, Shanghai Jinghong, China) to  
55 maintain the specified temperature so as to investigate demulsification performance.  
56 The residual oil in the lower phase was extracted with *n*-hexane and then its oil  
57 content was analyzed by a UV-vis spectrophotometer (Shimadzu, UV-2450, Japan).  
58 The oil content was converted into the oil removal ratio of emulsions to indicate the  
59 demulsification effect as follows:

$$R = \frac{c_0 - c}{c_0} \times 100 \% \quad (1)$$

60 where  $R$  (%) is the oil removal ratio of emulsions,  $c_0$  ( $\text{mg}\cdot\text{L}^{-1}$ ) represents the initial oil

61 content of the emulsions, and  $c$  ( $\text{mg}\cdot\text{L}^{-1}$ ) denotes the oil content during the process of  
62 demulsification. The wavelength of the characteristic absorption peak of oil,  
63 corresponding to  $c$  or  $c_0$ , was at 337.8 nm. Furthermore, the water content of upper  
64 phase was determined by Karl Fischer titration with a coulometric KF titrator (C20,  
65 Mettler Toledo). To more intuitively monitor the effect of CHPAMAM on  
66 demulsification process, the size of droplets in lower emulsion layer after different  
67 settling time was observed by an optical microscope.

## 68 **V. Interfacial tension correlation**

69 The dynamic interface tension curves were fitted into a biexponential (four  
70 parameter) decay equation to explore the ability of demulsifiers molecules to diffuse,  
71 absorb and rearrange on the interface membrane:

$$\gamma = ae^{(-bt)} + ce^{(-dt)} \quad (2)$$

72 where  $\gamma$  is the function of oil-water interfacial tension with time,  $\gamma_0$  is the initial  
73 interfacial tension,  $b$  and  $d$  represent the decaying trend of oil-water interfacial tension  
74 corresponding to the rapid attenuation in the initial stage and the subsequent slow  
75 attenuation, respectively. All of the experimental measurements were repeated three  
76 times and the average values were taken.

## 77 **VI. Interfacial film strength measurement**

78 The single-drop method was implemented to investigate the interfacial film  
79 strength and the ability of demulsifier to damage the oil-water interfacial film. The  
80 water phase containing the demulsifier and oil phase were placed in a constant  
81 temperature water bath. Subsequently, the diesel droplets moved slowly in the water

82 phase to form O/W-type droplets. When emulsified oil droplets reached the stable oil-  
83 water interfacial film, timing was triggered. The number of droplets in a single  
84 experiment was 50, and the coalescence time of droplets was recorded. Based on the  
85 Cockbain theory<sup>34</sup>, the rupture rate constant  $k$  was calculated with the following  
86 equation:

$$\ln \frac{N}{N_0} = kt + c \quad (3)$$

87 where  $N$  is the number of droplets at the moment  $t$ ,  $N_0$  represents the total number of  
88 droplets involved in single experiment, and  $c$  denotes the regression factor.

89 The time required for half the number of experimental droplets to rupture is defined  
90 as the half-life time of the droplets. The combination of half-life time ( $t_{1/2}$ ), drainage  
91 time ( $t_d$ ), and rupture rate constant ( $k$ ) can be used to evaluate interfacial film strength,  
92 and the following relationship is obtained:

$$t_{1/2} = t_d + \frac{\ln 2}{k} \quad (4)$$

## 93 **VII. Interfacial rheology measurement**

94 Dilatational modulus ( $\varepsilon$ ) is obtained from the ratio of the interfacial tension ( $\gamma$ )  
95 response to the relative area ( $A$ ) variation, as shown in the following equation:

$$\varepsilon = \frac{d\gamma}{d\ln A} \quad (5)$$

96 The dilatational modulus is divided into elastic modulus ( $\varepsilon'$ ) and viscous modulus ( $\varepsilon''$ ).  
97 The elastic modulus can effectively reflect the ability of the interfacial film to resist  
98 deformation; the viscous modulus is used to predict the diffusion, adsorption and  
99 rearrangement ability of the emulsion breaker molecules at the interface. Therefore,

100 dilatational modulus can be drawn as follows:

$$\varepsilon = \varepsilon' + i\varepsilon'' \quad (6)$$

$$\varepsilon'' = \omega\eta_d \quad (7)$$

101 where  $\omega$  and  $\eta_d$  are defined as oscillation frequency of the interfacial film and  
102 interfacial dilatational viscosity, respectively.

### 103 **VIII. Dissipative particle dynamics (DPD) method**

104 In the DPD simulation,  $N_m$  water molecules are typically coarse-grained into a bead.  
105 Based on the previous research on the construction of oil-water simulation system, the  
106 degree of coarse-grained is set to  $N_m = 3$ , indicating that one DPD water bead  
107 corresponds to three water molecules in the simulation system of this work. The  
108 scales of length ( $R_c$ ), mass ( $m$ ), and time ( $\tau$ ) can be evaluated in terms of the coarse  
109 graining:

$$R_c = 3.107(\rho N_m)^{1/3} \text{ \AA} \quad (8)$$

$$m = N_m \cdot m_{\text{water}} \text{ amu} \quad (9)$$

$$\tau = (1.41 \pm 0.1)N_m^{5/3} \text{ ps} \quad (10)$$

110 where the reduced density  $\rho = 3$ , which denotes the number of beads in a cubic  
111 volume of radius  $R_c$  is 3;  $m_{\text{water}}$  is the mass of a water molecule. The above three  
112 scales are calculated as  $R_c = 6.46 \text{ \AA}$ ,  $m = 54 \text{ amu}$ ,  $\tau = 8.8 \text{ ps}$ .

113 The reasonable calculation of the interaction parameters between different  
114 structural units is the most critical in DPD simulation to construct the force field of  
115 the whole coarse-grained model and explore the motion state of each particle in the  
116 system from the mesoscopic level. The DPD theory is correlated with the Flory -

117 Huggins theory, and the DPD conservative force parameters ( $a_{ij}$ ) are further derived  
118 from the Flory-Huggins parameters ( $\chi_{ij}$ ), thus achieving the integration of abstract  
119 models and real chemical components, the empirical correlation as follows:

$$a_{ij} \approx a_{ii} + 3.27\chi_{ij}(\rho = 3) \quad (11)$$

120 where  $a_{ii}$  is the repulsive force between homogeneous beads, and  $\rho$  is the density of  
121 the number of particles in the system. The density  $\rho$  of coarse-grained beads is set to 3,  
122 therefore the initial  $a_{ii}$  is 25, and  $a_{ij}$  is 78 in this emulsion system. The parameters  $\chi_{ij}$  at  
123 different temperatures can be deduced by calculating the solubility parameters of  
124 beads  $i$  and  $j$  in the system:

$$\chi_{ij} = \frac{v_{ij}}{RT}(\delta_i - \delta_j)^2 \quad (12)$$

125 where  $v_{ij}$  is the average molar volume of beads  $i$  and  $j$ ,  $R$  is the ideal gas constant,  $\delta_i$   
126 and  $\delta_j$  are the Hansen solubility parameters of each bead at temperature  $T$ . For  
127 macromolecular systems where the solubility parameters are difficult to be measured  
128 experimentally, the solubility parameters of individual beads in this model are further  
129 obtained by Cohesion Energy Density (CED) calculation, as shown in the following  
130 equation:

$$\delta_i = \sqrt{\frac{E_{\text{coh}}}{V_i^0}} = \sqrt{\frac{\Delta_{\text{vap}}H_m - RT}{V_i^0}} \quad (13)$$

131 where  $E_{\text{coh}}$ ,  $V_i^0$  and  $\Delta_{\text{vap}}H_m$  are the cohesive energy, volume and enthalpy of  
132 vaporization of component  $i$ , respectively. The calculations are performed with the  
133 Forcite module in Materials Studio software.

134

135

136

137

**Table S1** Volume ( $v$ ) of coarse-grained beads at 303.15 K/  $\text{\AA}^3$ 

| 303.15K        | A <sub>2</sub> | A <sub>3</sub> | A <sub>4</sub> | A <sub>6</sub> | R <sub>2</sub> | R <sub>3</sub> | R <sub>4</sub> | O <sub>1</sub> | O <sub>2</sub> | S      | N <sub>1</sub> | N <sub>2</sub> | W     | PAM   | P <sub>1</sub> | P <sub>2</sub> | P <sub>3</sub> | P <sub>4</sub> |
|----------------|----------------|----------------|----------------|----------------|----------------|----------------|----------------|----------------|----------------|--------|----------------|----------------|-------|-------|----------------|----------------|----------------|----------------|
| A <sub>2</sub> | 58.10          |                |                |                |                |                |                |                |                |        |                |                |       |       |                |                |                |                |
| A <sub>3</sub> | 65.60          | 73.10          |                |                |                |                |                |                |                |        |                |                |       |       |                |                |                |                |
| A <sub>4</sub> | 73.85          | 81.35          | 89.60          |                |                |                |                |                |                |        |                |                |       |       |                |                |                |                |
| A <sub>6</sub> | 73.75          | 81.25          | 89.50          | 89.40          |                |                |                |                |                |        |                |                |       |       |                |                |                |                |
| R <sub>2</sub> | 56.65          | 64.15          | 72.40          | 72.30          | 55.20          |                |                |                |                |        |                |                |       |       |                |                |                |                |
| R <sub>3</sub> | 66.87          | 74.37          | 82.62          | 82.52          | 65.42          | 75.62          |                |                |                |        |                |                |       |       |                |                |                |                |
| R <sub>4</sub> | 76.30          | 83.80          | 92.05          | 91.95          | 74.85          | 85.05          | 94.50          |                |                |        |                |                |       |       |                |                |                |                |
| O <sub>1</sub> | 72.95          | 80.45          | 88.70          | 88.60          | 71.50          | 81.70          | 91.15          | 87.80          |                |        |                |                |       |       |                |                |                |                |
| O <sub>2</sub> | 58.45          | 65.95          | 74.20          | 74.10          | 57.00          | 67.20          | 76.65          | 73.30          | 58.80          |        |                |                |       |       |                |                |                |                |
| S              | 65.60          | 73.10          | 81.35          | 81.25          | 64.15          | 74.35          | 83.80          | 80.45          | 65.95          | 73.10  |                |                |       |       |                |                |                |                |
| N <sub>1</sub> | 71.40          | 78.90          | 87.15          | 87.05          | 69.95          | 80.15          | 89.60          | 86.25          | 71.75          | 78.90  | 84.70          |                |       |       |                |                |                |                |
| N <sub>2</sub> | 61.65          | 69.15          | 77.40          | 77.30          | 60.20          | 70.40          | 79.85          | 76.50          | 62.00          | 69.15  | 74.95          | 65.20          |       |       |                |                |                |                |
| W              | 38.05          | 45.55          | 53.80          | 53.70          | 36.60          | 46.80          | 56.25          | 52.90          | 38.40          | 45.55  | 51.35          | 41.60          | 18.00 |       |                |                |                |                |
| PAM            | 59.79          | 67.29          | 75.54          | 75.44          | 58.34          | 68.54          | 77.99          | 74.64          | 60.14          | 67.29  | 73.09          | 63.34          | 39.74 | 61.49 |                |                |                |                |
| P <sub>1</sub> | 58.20          | 65.70          | 73.95          | 73.85          | 56.75          | 66.95          | 76.40          | 73.05          | 58.55          | 65.70  | 71.50          | 61.75          | 38.15 | 59.90 | 58.30          |                |                |                |
| P <sub>2</sub> | 71.00          | 78.50          | 86.75          | 86.65          | 69.55          | 79.75          | 89.20          | 85.85          | 71.35          | 78.50  | 84.30          | 74.55          | 50.95 | 72.70 | 71.10          | 83.90          |                |                |
| P <sub>3</sub> | 53.40          | 60.90          | 69.15          | 69.05          | 51.95          | 62.15          | 71.60          | 68.25          | 53.75          | 60.90  | 66.70          | 56.95          | 33.35 | 55.10 | 53.50          | 66.30          | 48.70          |                |
| P <sub>4</sub> | 95.80          | 103.30         | 111.55         | 111.45         | 94.35          | 104.55         | 114.00         | 110.65         | 96.15          | 103.30 | 109.10         | 99.35          | 75.75 | 97.50 | 95.90          | 108.70         | 91.10          | 133.50         |

138

**Table S2** Volume ( $v$ ) of coarse-grained beads at 318.15 K/  $\text{\AA}^3$ 

| 318.15K        | A <sub>2</sub> | A <sub>3</sub> | A <sub>4</sub> | A <sub>6</sub> | R <sub>2</sub> | R <sub>3</sub> | R <sub>4</sub> | O <sub>1</sub> | O <sub>2</sub> | S     | N <sub>1</sub> | N <sub>2</sub> | W     | PAM   | P <sub>1</sub> | P <sub>2</sub> | P <sub>3</sub> | P <sub>4</sub> |
|----------------|----------------|----------------|----------------|----------------|----------------|----------------|----------------|----------------|----------------|-------|----------------|----------------|-------|-------|----------------|----------------|----------------|----------------|
| A <sub>2</sub> | 58.10          |                |                |                |                |                |                |                |                |       |                |                |       |       |                |                |                |                |
| A <sub>3</sub> | 65.60          | 73.10          |                |                |                |                |                |                |                |       |                |                |       |       |                |                |                |                |
| A <sub>4</sub> | 73.85          | 81.35          | 89.60          |                |                |                |                |                |                |       |                |                |       |       |                |                |                |                |
| A <sub>6</sub> | 73.75          | 81.25          | 89.50          | 89.40          |                |                |                |                |                |       |                |                |       |       |                |                |                |                |
| R <sub>2</sub> | 56.65          | 64.15          | 72.40          | 72.30          | 55.20          |                |                |                |                |       |                |                |       |       |                |                |                |                |
| R <sub>3</sub> | 66.87          | 74.37          | 82.62          | 82.52          | 65.42          | 75.62          |                |                |                |       |                |                |       |       |                |                |                |                |
| R <sub>4</sub> | 76.30          | 83.80          | 92.05          | 91.95          | 74.85          | 85.05          | 94.50          |                |                |       |                |                |       |       |                |                |                |                |
| O <sub>1</sub> | 72.95          | 80.45          | 88.70          | 88.60          | 71.50          | 81.70          | 91.15          | 87.80          |                |       |                |                |       |       |                |                |                |                |
| O <sub>2</sub> | 58.45          | 65.95          | 74.20          | 74.10          | 57.00          | 67.20          | 76.65          | 73.30          | 58.80          |       |                |                |       |       |                |                |                |                |
| S              | 65.60          | 73.10          | 81.35          | 81.25          | 64.15          | 74.35          | 83.80          | 80.45          | 65.95          | 73.10 |                |                |       |       |                |                |                |                |
| N <sub>1</sub> | 71.40          | 78.90          | 87.15          | 87.05          | 69.95          | 80.15          | 89.60          | 86.25          | 71.75          | 78.90 | 84.70          |                |       |       |                |                |                |                |
| N <sub>2</sub> | 61.65          | 69.15          | 77.40          | 77.30          | 60.20          | 70.40          | 79.85          | 76.50          | 62.00          | 69.15 | 74.95          | 65.20          |       |       |                |                |                |                |
| W              | 38.05          | 45.55          | 53.80          | 53.70          | 36.60          | 46.80          | 56.25          | 52.90          | 38.40          | 45.55 | 51.35          | 41.60          | 18.00 |       |                |                |                |                |
| PAM            | 59.79          | 67.29          | 75.54          | 75.44          | 58.34          | 68.54          | 77.99          | 74.64          | 60.14          | 67.29 | 73.09          | 63.34          | 39.74 | 61.49 |                |                |                |                |
| P <sub>1</sub> | 58.20          | 65.70          | 73.95          | 73.85          | 56.75          | 66.95          | 76.40          | 73.05          | 58.55          | 65.70 | 71.50          | 61.75          | 38.15 | 59.90 | 58.30          |                |                |                |



|                      |       |        |        |        |       |        |        |        |       |        |        |       |       |       |       |        |       |        |
|----------------------|-------|--------|--------|--------|-------|--------|--------|--------|-------|--------|--------|-------|-------|-------|-------|--------|-------|--------|
| <b>P<sub>2</sub></b> | 71.00 | 78.50  | 86.75  | 86.65  | 69.55 | 79.75  | 89.20  | 85.85  | 71.35 | 78.50  | 84.30  | 74.55 | 50.95 | 72.70 | 71.10 | 83.90  |       |        |
| <b>P<sub>3</sub></b> | 53.40 | 60.90  | 69.15  | 69.05  | 51.95 | 62.15  | 71.60  | 68.25  | 53.75 | 60.90  | 66.70  | 56.95 | 33.35 | 55.10 | 53.50 | 66.30  | 48.70 |        |
| <b>P<sub>4</sub></b> | 95.80 | 103.30 | 111.55 | 111.45 | 94.35 | 104.55 | 114.00 | 110.65 | 96.15 | 103.30 | 109.10 | 99.35 | 75.75 | 97.50 | 95.90 | 108.70 | 91.10 | 133.50 |

139

140

141

**Table S3** Volume ( $v$ ) of coarse-grained beads at 333.15 K/ Å<sup>3</sup>

| <b>333.15K</b>       | <b>A<sub>2</sub></b> | <b>A<sub>3</sub></b> | <b>A<sub>4</sub></b> | <b>A<sub>6</sub></b> | <b>R<sub>2</sub></b> | <b>R<sub>3</sub></b> | <b>R<sub>4</sub></b> | <b>O<sub>1</sub></b> | <b>O<sub>2</sub></b> | <b>S</b> | <b>N<sub>1</sub></b> | <b>N<sub>2</sub></b> | <b>W</b> | <b>PAM</b> | <b>P<sub>1</sub></b> | <b>P<sub>2</sub></b> | <b>P<sub>3</sub></b> | <b>P<sub>4</sub></b> |
|----------------------|----------------------|----------------------|----------------------|----------------------|----------------------|----------------------|----------------------|----------------------|----------------------|----------|----------------------|----------------------|----------|------------|----------------------|----------------------|----------------------|----------------------|
| <b>A<sub>2</sub></b> | 58.10                |                      |                      |                      |                      |                      |                      |                      |                      |          |                      |                      |          |            |                      |                      |                      |                      |
| <b>A<sub>3</sub></b> | 65.60                | 73.10                |                      |                      |                      |                      |                      |                      |                      |          |                      |                      |          |            |                      |                      |                      |                      |
| <b>A<sub>4</sub></b> | 73.85                | 81.35                | 89.60                |                      |                      |                      |                      |                      |                      |          |                      |                      |          |            |                      |                      |                      |                      |
| <b>A<sub>6</sub></b> | 73.75                | 81.25                | 89.50                | 89.40                |                      |                      |                      |                      |                      |          |                      |                      |          |            |                      |                      |                      |                      |
| <b>R<sub>2</sub></b> | 56.65                | 64.15                | 72.40                | 72.30                | 55.20                |                      |                      |                      |                      |          |                      |                      |          |            |                      |                      |                      |                      |
| <b>R<sub>3</sub></b> | 66.87                | 74.37                | 82.62                | 82.52                | 65.42                | 75.62                |                      |                      |                      |          |                      |                      |          |            |                      |                      |                      |                      |
| <b>R<sub>4</sub></b> | 76.30                | 83.80                | 92.05                | 91.95                | 74.85                | 85.05                | 94.50                |                      |                      |          |                      |                      |          |            |                      |                      |                      |                      |
| <b>O<sub>1</sub></b> | 72.95                | 80.45                | 88.70                | 88.60                | 71.50                | 81.70                | 91.15                | 87.80                |                      |          |                      |                      |          |            |                      |                      |                      |                      |
| <b>O<sub>2</sub></b> | 58.45                | 65.95                | 74.20                | 74.10                | 57.00                | 67.20                | 76.65                | 73.30                | 58.80                |          |                      |                      |          |            |                      |                      |                      |                      |
| <b>S</b>             | 65.60                | 73.10                | 81.35                | 81.25                | 64.15                | 74.35                | 83.80                | 80.45                | 65.95                | 73.10    |                      |                      |          |            |                      |                      |                      |                      |
| <b>N<sub>1</sub></b> | 71.40                | 78.90                | 87.15                | 87.05                | 69.95                | 80.15                | 89.60                | 86.25                | 71.75                | 78.90    | 84.70                |                      |          |            |                      |                      |                      |                      |
| <b>N<sub>2</sub></b> | 61.65                | 69.15                | 77.40                | 77.30                | 60.20                | 70.40                | 79.85                | 76.50                | 62.00                | 69.15    | 74.95                | 65.20                |          |            |                      |                      |                      |                      |
| <b>W</b>             | 38.05                | 45.55                | 53.80                | 53.70                | 36.60                | 46.80                | 56.25                | 52.90                | 38.40                | 45.55    | 51.35                | 41.60                | 18.00    |            |                      |                      |                      |                      |
| <b>PAM</b>           | 59.79                | 67.29                | 75.54                | 75.44                | 58.34                | 68.54                | 77.99                | 74.64                | 60.14                | 67.29    | 73.09                | 63.34                | 39.74    | 61.49      |                      |                      |                      |                      |
| <b>P<sub>1</sub></b> | 58.20                | 65.70                | 73.95                | 73.85                | 56.75                | 66.95                | 76.40                | 73.05                | 58.55                | 65.70    | 71.50                | 61.75                | 38.15    | 59.90      | 58.30                |                      |                      |                      |
| <b>P<sub>2</sub></b> | 71.00                | 78.50                | 86.75                | 86.65                | 69.55                | 79.75                | 89.20                | 85.85                | 71.35                | 78.50    | 84.30                | 74.55                | 50.95    | 72.70      | 71.10                | 83.90                |                      |                      |
| <b>P<sub>3</sub></b> | 53.40                | 60.90                | 69.15                | 69.05                | 51.95                | 62.15                | 71.60                | 68.25                | 53.75                | 60.90    | 66.70                | 56.95                | 33.35    | 55.10      | 53.50                | 66.30                | 48.70                |                      |
| <b>P<sub>4</sub></b> | 95.80                | 103.30               | 111.55               | 111.45               | 94.35                | 104.55               | 114.00               | 110.65               | 96.15                | 103.30   | 109.10               | 99.35                | 75.75    | 97.50      | 95.90                | 108.70               | 91.10                | 133.50               |

142

**Table S4** Solubility parameter ( $\delta$ ) of coarse-grained beads at 303.15 K/ MPa<sup>1/2</sup>

| <b>303.15K</b>       | <b>A<sub>2</sub></b> | <b>A<sub>3</sub></b> | <b>A<sub>4</sub></b> | <b>A<sub>6</sub></b> | <b>R<sub>2</sub></b> | <b>R<sub>3</sub></b> | <b>R<sub>4</sub></b> | <b>O<sub>1</sub></b> | <b>O<sub>2</sub></b> | <b>S</b> | <b>N<sub>1</sub></b> | <b>N<sub>2</sub></b> | <b>W</b> | <b>PAM</b> | <b>P<sub>1</sub></b> | <b>P<sub>2</sub></b> | <b>P<sub>3</sub></b> | <b>P<sub>4</sub></b> |
|----------------------|----------------------|----------------------|----------------------|----------------------|----------------------|----------------------|----------------------|----------------------|----------------------|----------|----------------------|----------------------|----------|------------|----------------------|----------------------|----------------------|----------------------|
| <b>A<sub>2</sub></b> | 0.00                 |                      |                      |                      |                      |                      |                      |                      |                      |          |                      |                      |          |            |                      |                      |                      |                      |
| <b>A<sub>3</sub></b> | 6.02                 | 0.00                 |                      |                      |                      |                      |                      |                      |                      |          |                      |                      |          |            |                      |                      |                      |                      |
| <b>A<sub>4</sub></b> | 11.99                | 1.02                 | 0.00                 |                      |                      |                      |                      |                      |                      |          |                      |                      |          |            |                      |                      |                      |                      |
| <b>A<sub>6</sub></b> | 17.91                | 3.16                 | 0.59                 | 0.00                 |                      |                      |                      |                      |                      |          |                      |                      |          |            |                      |                      |                      |                      |
| <b>R<sub>2</sub></b> | 0.38                 | 9.42                 | 16.63                | 23.50                | 0.00                 |                      |                      |                      |                      |          |                      |                      |          |            |                      |                      |                      |                      |
| <b>R<sub>3</sub></b> | 0.03                 | 5.15                 | 10.75                | 16.38                | 0.64                 | 0.00                 |                      |                      |                      |          |                      |                      |          |            |                      |                      |                      |                      |
| <b>R<sub>4</sub></b> | 0.71                 | 2.59                 | 6.86                 | 11.48                | 2.13                 | 0.44                 | 0.00                 |                      |                      |          |                      |                      |          |            |                      |                      |                      |                      |
| <b>O<sub>1</sub></b> | 54.33                | 24.18                | 15.27                | 9.85                 | 63.79                | 51.64                | 42.59                | 0.00                 |                      |          |                      |                      |          |            |                      |                      |                      |                      |
| <b>O<sub>2</sub></b> | 72.89                | 37.01                | 25.75                | 18.53                | 83.78                | 69.77                | 59.18                | 1.36                 | 0.00                 |          |                      |                      |          |            |                      |                      |                      |                      |
| <b>S</b>             | 24.78                | 6.37                 | 2.29                 | 0.56                 | 31.28                | 22.97                | 17.08                | 5.73                 | 12.67                | 0.00     |                      |                      |          |            |                      |                      |                      |                      |
| <b>N<sub>1</sub></b> | 42.47                | 16.51                | 9.33                 | 5.22                 | 50.88                | 40.10                | 32.18                | 0.73                 | 4.08                 | 2.37     | 0.00                 |                      |          |            |                      |                      |                      |                      |
| <b>N<sub>2</sub></b> | 20.04                | 4.09                 | 1.03                 | 0.06                 | 25.93                | 18.42                | 13.19                | 8.38                 | 16.49                | 0.25     | 4.16                 | 0.00                 |          |            |                      |                      |                      |                      |
| <b>W</b>             | 1053.33              | 900.09               | 840.56               | 796.52               | 1093.68              | 1041.38              | 999.23               | 629.22               | 572.05               | 755.01   | 672.77               | 782.79               | 0.00     |            |                      |                      |                      |                      |
| <b>PAM</b>           | 165.76               | 108.61               | 88.59                | 74.69                | 182.00               | 161.04               | 144.73               | 30.30                | 18.81                | 62.37    | 40.42                | 70.53                | 383.38   | 0.00       |                      |                      |                      |                      |

|                      |        |       |       |       |        |        |        |       |       |       |       |       |        |        |        |       |      |      |  |
|----------------------|--------|-------|-------|-------|--------|--------|--------|-------|-------|-------|-------|-------|--------|--------|--------|-------|------|------|--|
| <b>P<sub>1</sub></b> | 3.72   | 0.27  | 2.35  | 5.30  | 6.48   | 3.05   | 1.18   | 29.60 | 43.66 | 9.29  | 21.04 | 6.49  | 931.78 | 119.79 | 0.00   |       |      |      |  |
| <b>P<sub>2</sub></b> | 145.49 | 92.32 | 73.95 | 61.30 | 160.73 | 141.07 | 125.84 | 22.01 | 12.42 | 50.19 | 30.75 | 57.54 | 415.87 | 0.66   | 102.66 | 0.00  |      |      |  |
| <b>P<sub>3</sub></b> | 91.84  | 50.84 | 37.46 | 28.63 | 104.02 | 88.34  | 76.37  | 4.90  | 1.09  | 21.21 | 9.40  | 26.08 | 523.11 | 10.83  | 58.58  | 6.14  | 0.00 |      |  |
| <b>P<sub>4</sub></b> | 50.92  | 21.92 | 13.49 | 8.43  | 60.08  | 48.32  | 39.58  | 0.06  | 1.97  | 4.66  | 0.38  | 7.07  | 641.08 | 32.94  | 27.10  | 24.27 | 5.99 | 0.00 |  |

143

144

145

**Table S5** Solubility parameter ( $\delta$ ) of coarse-grained beads at 318.15 K/ MPa<sup>1/2</sup>

| <b>318.15K</b>       | <b>A<sub>2</sub></b> | <b>A<sub>3</sub></b> | <b>A<sub>4</sub></b> | <b>A<sub>6</sub></b> | <b>R<sub>2</sub></b> | <b>R<sub>3</sub></b> | <b>R<sub>4</sub></b> | <b>O<sub>1</sub></b> | <b>O<sub>2</sub></b> | <b>S</b> | <b>N<sub>1</sub></b> | <b>N<sub>2</sub></b> | <b>W</b> | <b>PAM</b> | <b>P<sub>1</sub></b> | <b>P<sub>2</sub></b> | <b>P<sub>3</sub></b> | <b>P<sub>4</sub></b> |  |
|----------------------|----------------------|----------------------|----------------------|----------------------|----------------------|----------------------|----------------------|----------------------|----------------------|----------|----------------------|----------------------|----------|------------|----------------------|----------------------|----------------------|----------------------|--|
| <b>A<sub>2</sub></b> | 0.00                 |                      |                      |                      |                      |                      |                      |                      |                      |          |                      |                      |          |            |                      |                      |                      |                      |  |
| <b>A<sub>3</sub></b> | 6.64                 | 0.00                 |                      |                      |                      |                      |                      |                      |                      |          |                      |                      |          |            |                      |                      |                      |                      |  |
| <b>A<sub>4</sub></b> | 13.81                | 1.30                 | 0.00                 |                      |                      |                      |                      |                      |                      |          |                      |                      |          |            |                      |                      |                      |                      |  |
| <b>A<sub>6</sub></b> | 20.23                | 3.69                 | 0.61                 | 0.00                 |                      |                      |                      |                      |                      |          |                      |                      |          |            |                      |                      |                      |                      |  |
| <b>R<sub>2</sub></b> | 0.22                 | 9.28                 | 17.52                | 24.67                | 0.00                 |                      |                      |                      |                      |          |                      |                      |          |            |                      |                      |                      |                      |  |
| <b>R<sub>3</sub></b> | 0.33                 | 4.01                 | 9.87                 | 15.39                | 1.09                 | 0.00                 |                      |                      |                      |          |                      |                      |          |            |                      |                      |                      |                      |  |
| <b>R<sub>4</sub></b> | 1.17                 | 2.23                 | 6.94                 | 11.66                | 2.41                 | 0.26                 | 0.00                 |                      |                      |          |                      |                      |          |            |                      |                      |                      |                      |  |
| <b>O<sub>1</sub></b> | 60.94                | 27.35                | 16.72                | 10.95                | 68.48                | 52.30                | 45.20                | 0.00                 |                      |          |                      |                      |          |            |                      |                      |                      |                      |  |
| <b>O<sub>2</sub></b> | 75.19                | 37.14                | 24.54                | 17.41                | 83.53                | 65.55                | 57.57                | 0.75                 | 0.00                 |          |                      |                      |          |            |                      |                      |                      |                      |  |
| <b>S</b>             | 27.10                | 6.91                 | 2.22                 | 0.50                 | 32.20                | 21.45                | 17.00                | 6.76                 | 12.01                | 0.00     |                      |                      |          |            |                      |                      |                      |                      |  |
| <b>N<sub>1</sub></b> | 43.86                | 16.37                | 8.44                 | 4.51                 | 50.28                | 36.57                | 30.68                | 1.40                 | 4.20                 | 2.01     | 0.00                 |                      |          |            |                      |                      |                      |                      |  |
| <b>N<sub>2</sub></b> | 20.84                | 3.95                 | 0.72                 | 0.00                 | 25.33                | 15.92                | 12.12                | 10.51                | 16.86                | 0.41     | 4.23                 | 0.00                 |          |            |                      |                      |                      |                      |  |
| <b>W</b>             | 1034.02              | 874.93               | 808.78               | 764.98               | 1064.37              | 997.38               | 965.53               | 592.91               | 551.55               | 726.31   | 651.97               | 761.29               | 0.00     |            |                      |                      |                      |                      |  |
| <b>PAM</b>           | 168.52               | 108.26               | 85.83                | 71.97                | 180.91               | 153.93               | 141.57               | 26.78                | 18.58                | 60.46    | 40.44                | 70.85                | 367.66   | 0.00       |                      |                      |                      |                      |  |
| <b>P<sub>1</sub></b> | 4.76                 | 0.16                 | 2.36                 | 5.37                 | 7.02                 | 2.58                 | 1.21                 | 31.64                | 42.12                | 9.15     | 19.72                | 5.68                 | 898.49   | 116.65     | 0.00                 |                      |                      |                      |  |
| <b>P<sub>2</sub></b> | 152.63               | 95.60                | 74.60                | 61.72                | 164.42               | 138.75               | 127.04               | 20.68                | 13.57                | 51.10    | 32.85                | 60.68                | 392.12   | 0.39       | 103.49               | 0.00                 |                      |                      |  |
| <b>P<sub>3</sub></b> | 92.57                | 49.62                | 34.86                | 26.25                | 101.81               | 81.84                | 72.90                | 3.29                 | 0.90                 | 19.49    | 8.99                 | 25.57                | 507.82   | 11.29      | 55.35                | 7.47                 | 0.00                 |                      |  |
| <b>P<sub>4</sub></b> | 55.07                | 23.47                | 13.72                | 8.55                 | 62.25                | 46.87                | 40.17                | 0.15                 | 1.56                 | 4.91     | 0.64                 | 8.16                 | 611.82   | 30.92      | 27.46                | 24.33                | 4.84                 | 0.00                 |  |

146

**Table S6** Solubility parameter ( $\delta$ ) of coarse-grained beads at 333.15 K/ MPa<sup>1/2</sup>

| <b>333.15K</b>       | <b>A<sub>2</sub></b> | <b>A<sub>3</sub></b> | <b>A<sub>4</sub></b> | <b>A<sub>6</sub></b> | <b>R<sub>2</sub></b> | <b>R<sub>3</sub></b> | <b>R<sub>4</sub></b> | <b>O<sub>1</sub></b> | <b>O<sub>2</sub></b> | <b>S</b> | <b>N<sub>1</sub></b> | <b>N<sub>2</sub></b> | <b>W</b> | <b>PAM</b> | <b>P<sub>1</sub></b> | <b>P<sub>2</sub></b> | <b>P<sub>3</sub></b> | <b>P<sub>4</sub></b> |  |
|----------------------|----------------------|----------------------|----------------------|----------------------|----------------------|----------------------|----------------------|----------------------|----------------------|----------|----------------------|----------------------|----------|------------|----------------------|----------------------|----------------------|----------------------|--|
| <b>A<sub>2</sub></b> | 0.00                 |                      |                      |                      |                      |                      |                      |                      |                      |          |                      |                      |          |            |                      |                      |                      |                      |  |
| <b>A<sub>3</sub></b> | 7.03                 | 0.00                 |                      |                      |                      |                      |                      |                      |                      |          |                      |                      |          |            |                      |                      |                      |                      |  |
| <b>A<sub>4</sub></b> | 15.94                | 1.80                 | 0.00                 |                      |                      |                      |                      |                      |                      |          |                      |                      |          |            |                      |                      |                      |                      |  |
| <b>A<sub>6</sub></b> | 23.68                | 4.91                 | 0.76                 | 0.00                 |                      |                      |                      |                      |                      |          |                      |                      |          |            |                      |                      |                      |                      |  |
| <b>R<sub>2</sub></b> | 0.02                 | 6.26                 | 14.77                | 22.24                | 0.00                 |                      |                      |                      |                      |          |                      |                      |          |            |                      |                      |                      |                      |  |
| <b>R<sub>3</sub></b> | 2.02                 | 1.52                 | 6.62                 | 11.87                | 1.61                 | 0.00                 |                      |                      |                      |          |                      |                      |          |            |                      |                      |                      |                      |  |
| <b>R<sub>4</sub></b> | 2.81                 | 0.95                 | 5.37                 | 10.18                | 2.33                 | 0.07                 | 0.00                 |                      |                      |          |                      |                      |          |            |                      |                      |                      |                      |  |
| <b>O<sub>1</sub></b> | 64.05                | 28.64                | 16.08                | 9.84                 | 61.67                | 43.34                | 40.03                | 0.00                 |                      |          |                      |                      |          |            |                      |                      |                      |                      |  |
| <b>O<sub>2</sub></b> | 73.98                | 35.40                | 21.23                | 13.95                | 71.42                | 51.57                | 47.96                | 0.36                 | 0.00                 |          |                      |                      |          |            |                      |                      |                      |                      |  |
| <b>S</b>             | 31.38                | 8.71                 | 2.59                 | 0.54                 | 29.72                | 17.49                | 15.41                | 5.76                 | 8.99                 | 0.00     |                      |                      |          |            |                      |                      |                      |                      |  |
| <b>N<sub>1</sub></b> | 52.01                | 20.80                | 10.36                | 5.50                 | 49.87                | 33.55                | 30.65                | 0.63                 | 1.93                 | 2.59     | 0.00                 |                      |          |            |                      |                      |                      |                      |  |
| <b>N<sub>2</sub></b> | 23.15                | 4.67                 | 0.67                 | 0.00                 | 21.72                | 11.50                | 9.83                 | 10.19                | 14.36                | 0.63     | 5.76                 | 0.00                 |          |            |                      |                      |                      |                      |  |
| <b>W</b>             | 1093.96              | 925.62               | 845.76               | 795.75               | 1084.06              | 1002.04              | 985.90               | 628.61               | 598.98               | 754.77   | 668.89               | 798.85               | 0.00     |            |                      |                      |                      |                      |  |









Table S14 Characterization of synthesized HPAMAM and CHPAMAM samples.

| Polymer                  | RNH <sub>2</sub> | R <sub>2</sub> NH | R <sub>3</sub> N | HLB   | Size (nm) |
|--------------------------|------------------|-------------------|------------------|-------|-----------|
| HPAMAM <sub>1</sub>      | 27               | 50                | 24               | 13.15 | 3.97      |
| HPAMAM <sub>2</sub>      | 52               | 121               | 36               | 14.26 | 4.46      |
| HPAMAM <sub>3</sub>      | 106              | 218               | 94               | 14.51 | 5.06      |
| CHPAMAM <sub>1-15%</sub> | 17               | 44                | 24               | 8.13  | 4.12      |
| CHPAMAM <sub>2-5%</sub>  | 44               | 118               | 36               | 12.14 | 4.86      |
| CHPAMAM <sub>2-10%</sub> | 34               | 117               | 36               | 10.49 | 5.11      |
| CHPAMAM <sub>2-15%</sub> | 31               | 111               | 36               | 9.91  | 5.37      |
| CHPAMAM <sub>2-20%</sub> | 22               | 108               | 36               | 8.31  | 5.78      |
| CHPAMAM <sub>3-15%</sub> | 65               | 196               | 94               | 9.06  | 6.01      |

## 166 X. The evaluation experiment of HPAMAM demulsification effect

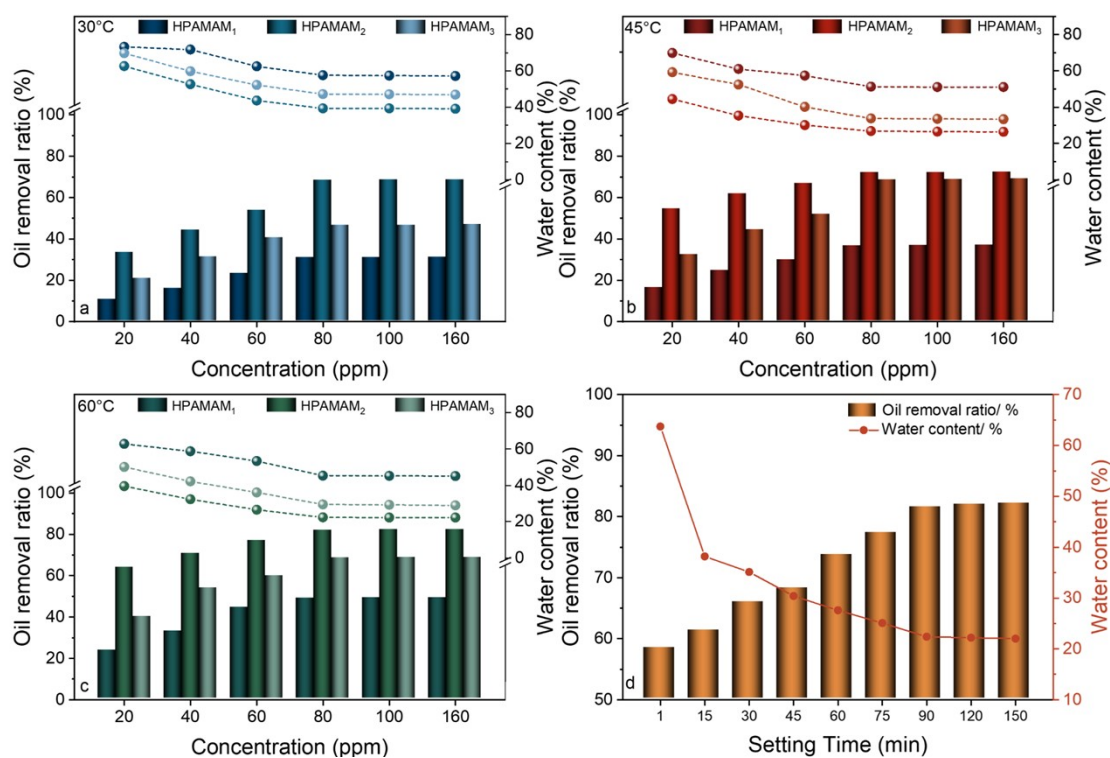

168 Fig. S3 Effects of demulsifier concentration and operation temperature on the demulsification  
 169 performance (column: oil removal ratio of emulsions and line+symbol: water content of oil phase) with  
 170 CHPAMAM as demulsifiers after 40 min at different temperatures ranging from 30 °C to 60 °C for the  
 171 emulsions with oil-water ratios of 1:9.

## 172 XI. The demulsification performance of CHPAMAM in different emulsions

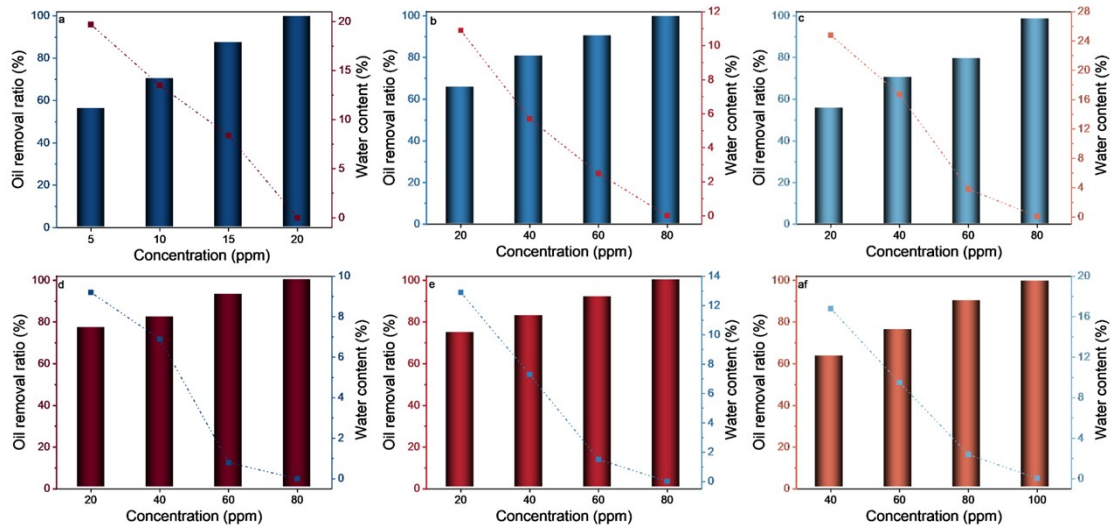

173

174 **Fig. S4** Demulsification performance of CHPAMAM demulsifier on (a) crude oil/ water emulsions with  
 175 50 % crude oil after setting for 30 min, (b) water/ crude oil emulsions with 10 % water after setting for  
 176 40 min, (c) water/ bitumen emulsions with 5.0 % water after setting for 30 min, (d) light crude oil/  
 177 water emulsions with 40 % light crude oil after setting for 30 min, (e) crude oil/ water emulsions with  
 178 1.0 % crude oil after setting for 10 min, (f) water/ crude oil emulsions with 50 % crude oil after setting  
 179 for 20 min.

180 **XII. The tendency of the viscous modulus with CHPAMAM at various oscillation**  
 181 **frequencies**

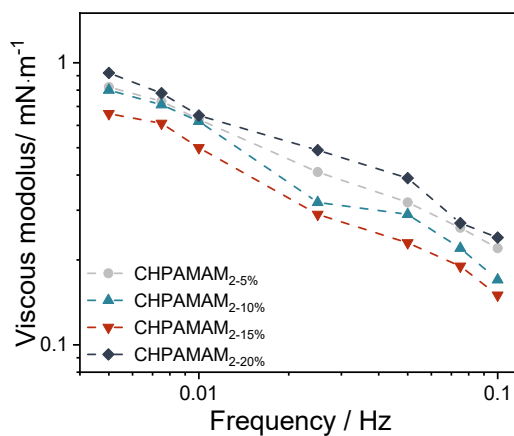

182

183 **Fig. S5** Effect of the oscillating frequency on viscous modulus of oil-water interface containing Span 80 and  
 184 Tween 80 with 80 ppm CHPAMAM demulsifiers.

185 **XIII. Simulation of dissipative particle dynamics**



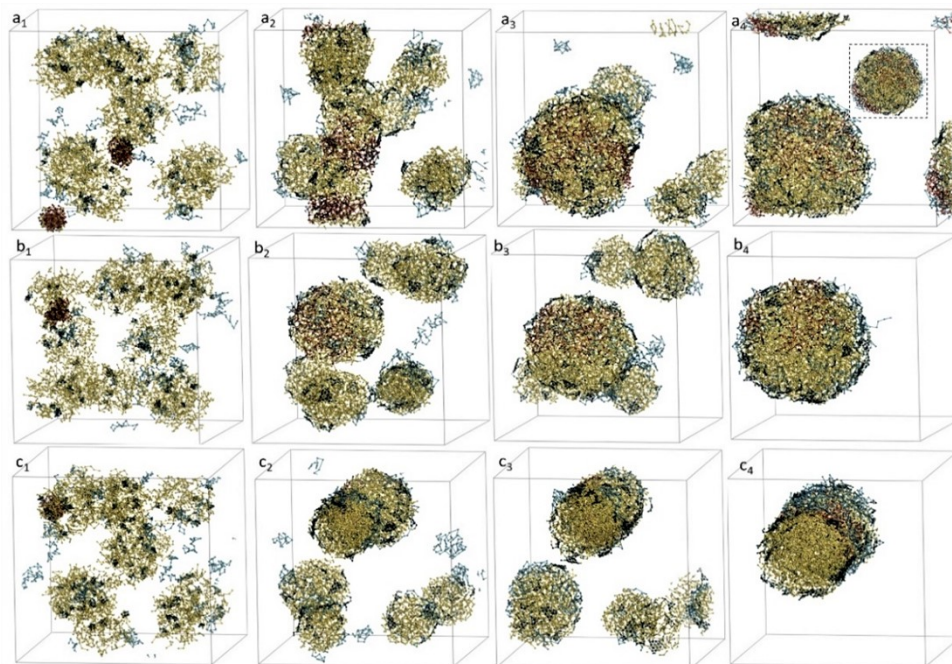

186

187 **Fig.S6** Effect of temperature on the demulsification process for the emulsions of oil-water ratios 2:8 with  
 188 CHPAMAM during the DPD simulation (Model basic parameters: temperature is (a) 303.15K, (b) 318.15K, or (c)  
 189 333.15K, and CHPAMAM concentration is 80 ppm) at different time steps: (a<sub>1</sub>-c<sub>1</sub>)  $5 \times 10^4$ steps; (a<sub>2</sub>-c<sub>2</sub>)  $20$   
 190  $\times 10^4$ steps; (a<sub>3</sub>-c<sub>3</sub>)  $160 \times 10^4$ steps; (a<sub>4</sub>-c<sub>4</sub>)  $240 \times 10^4$ steps.

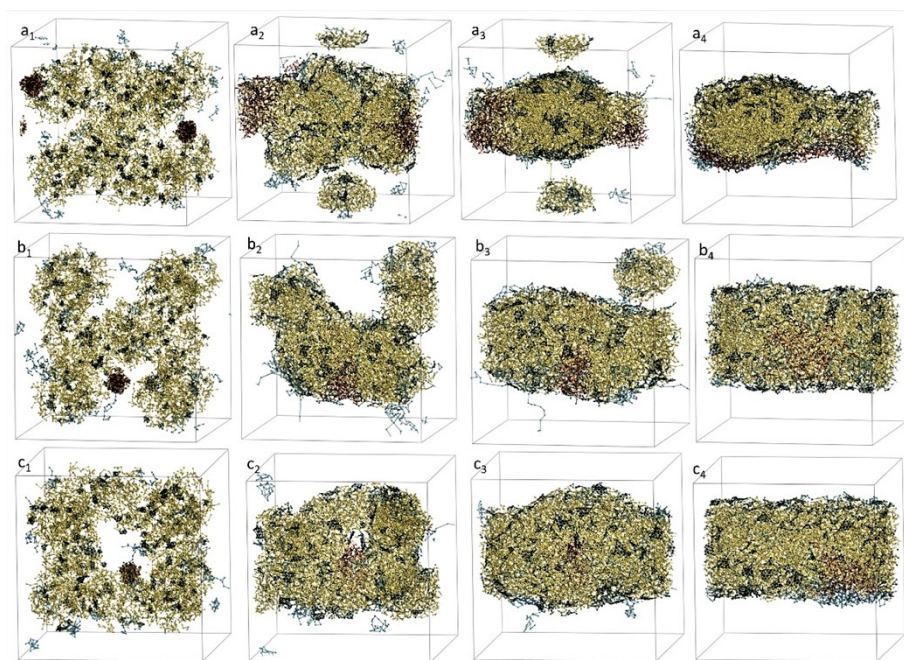

191

192 **Fig.S7** Effect of temperature on the demulsification process for the emulsions of oil-water ratios 3:7 with  
 193 CHPAMAM during the DPD simulation (Model basic parameters: Temperature is (a) 303.15K, (b) 318.15K, (c)  
 194 333.15K, respectively, and CHPAMAM concentration is 80 ppm) at different time steps: (a<sub>1</sub>-c<sub>1</sub>)  $5 \times 10^4$ steps; (a<sub>2</sub>-c<sub>2</sub>)  
 195  $20 \times 10^4$ steps; (a<sub>3</sub>-c<sub>3</sub>)  $160 \times 10^4$ steps; (a<sub>4</sub>-c<sub>4</sub>)  $240 \times 10^4$ steps.

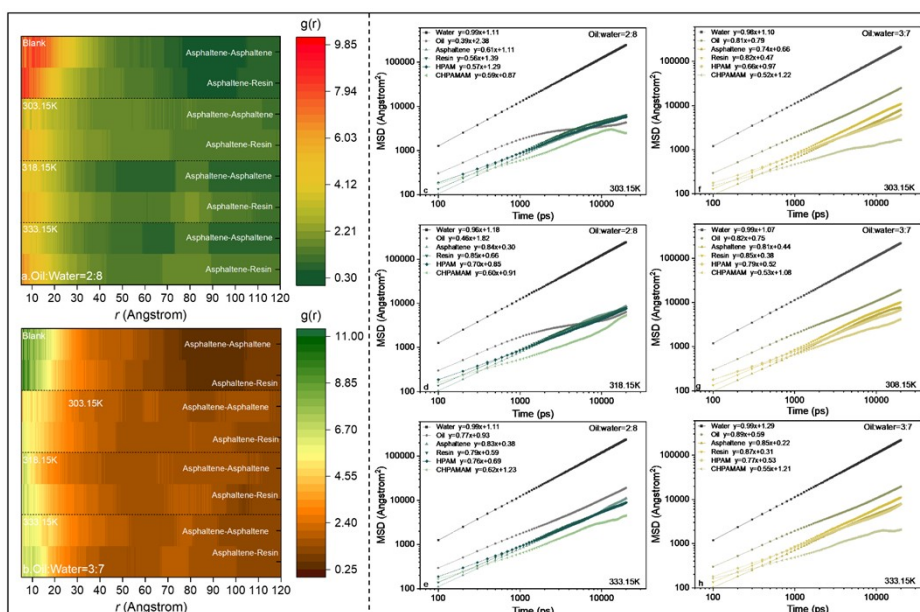

196

197 **Fig.S8** Radial distribution functions of asphaltene and asphaltene, asphaltene and resin in emulsions with oil-water  
 198 ratios (a) 2:8 and (b) 3:7 after adding 80 ppm CHPAMAM at different temperatures. Mean square displacements  
 199 of each component in emulsions with oil-water ratios (c-e) 1:9 and (f-h) 4:6 after adding 80 ppm CHPAMAM at  
 200 different temperatures.

## 201 XIV. Components of crude oil produced emulsions

202 **Table S15** Characteristics of produced emulsions from two China oilfields

| Parameter                | value                   | Parameter                        | value                      |
|--------------------------|-------------------------|----------------------------------|----------------------------|
| <b>Xinan Oilfield</b>    |                         |                                  |                            |
| Oil content              | 13.4 %                  | Salinity                         | 4315.5 mg L <sup>-1</sup>  |
| pH                       | 8.8                     | Mg <sup>2+</sup>                 | 10.3 mg L <sup>-1</sup>    |
| Density at 293 K         | 0.90 g cm <sup>-3</sup> | Ca <sup>2+</sup>                 | 34.5 mg L <sup>-1</sup>    |
| Viscosity at 329 K       | 89.2 mPa s              | K <sup>+</sup> + Na <sup>+</sup> | 2493.1 mg L <sup>-1</sup>  |
| Asphaltene               | 2.7 %                   | Cl <sup>-</sup>                  | 2034.2 mg L <sup>-1</sup>  |
| Resin                    | 19.4 %                  | HCO <sub>3</sub> <sup>-</sup>    | 1469.4 mg L <sup>-1</sup>  |
| <b>Xinjiang Oilfield</b> |                         |                                  |                            |
| Oil content              | 38.7 %                  | Salinity                         | 10451.8 mg L <sup>-1</sup> |
| pH                       | 10.7                    | Mg <sup>2+</sup>                 | 15.3 mg L <sup>-1</sup>    |
| Density at 293 K         | 0.98 g cm <sup>-3</sup> | Ca <sup>2+</sup>                 | 29.7 mg L <sup>-1</sup>    |
| Viscosity at 329 K       | 6250.3 mPa s            | K <sup>+</sup> + Na <sup>+</sup> | 5128.7 mg L <sup>-1</sup>  |
| Asphaltene               | 10.6 %                  | Cl <sup>-</sup>                  | 4962.6 mg L <sup>-1</sup>  |
| Resin                    | 24.3 %                  | HCO <sub>3</sub> <sup>-</sup>    | 1531.2 mg L <sup>-1</sup>  |

203
